# Supplementary material for: Synergy between microelectrolysis and trimetallic MOFs activates perovskite monosulfate for ofloxacin degradation
Source: Royal Society of Chemistry journal article supplement (doi:10.1039/d4nj05373g), 2025-01-01
Supplement: d4nj05373g1.pdf [file d4nj05373g1.pdf]

### Text S1

Ferrous sulfate heptahydrate ( $\text{FeSO}_4 \cdot 7\text{H}_2\text{O}$ ), sodium chloride ( $\text{NaCl}$ ), sodium sulfate ( $\text{Na}_2\text{SO}_4$ ), urea and sodium bicarbonate ( $\text{NaHCO}_3$ ) are purchased from Tianjin Damao Chemical Reagent Factory. Cobalt (II) acetate tetrahydrate ( $(\text{CH}_3\text{COO})_2\text{Co} \cdot 4\text{H}_2\text{O}$ ) and copper nitrate trihydrate ( $\text{Cu}(\text{NO}_3)_2 \cdot 3\text{H}_2\text{O}$ ) was purchased from Shanghai Zhanyun Chemical Co, LTD. Tetracycline hydrochloride (TC,  $\text{C}_{22}\text{H}_{24}\text{N}_2\text{O}_8$ ) was purchased from Aladdin's reagent platform. Potassium dihydrogen phosphate ( $\text{KH}_2\text{PO}_4$ ) was purchased from Tianjin Tian-li Chemical Reagent Co, LTD. Tert-butanol (TBA,  $\text{C}_4\text{H}_{10}\text{O}$ ) was purchased from Sinopharm Group Chemical Reagent Co, LTD. Furfuryl alcohol (FFA,  $\text{C}_5\text{H}_6\text{O}_2$ ), 2-methyl imidazole (2-HMIM), and terephthalic acid (PTA,  $\text{C}_8\text{H}_6\text{O}_4$ ) are purchased from Shanghai Maclin Biochemical Technology Co, LTD. P-benzoquinone (p-BQ,  $\text{C}_6\text{H}_4\text{O}_2$ ) was purchased from Aladdin's reagent platform. N, N dimethylformamide (DMF,  $\text{C}_3\text{H}_7\text{NO}$ ), anhydrous ethanol (EtOH,  $\text{C}_2\text{H}_5\text{OH}$ ), 5, 5-dimethyl-1-pyrroline n-oxide (DMPO) and 2, 2, 6, 6-tetramethylpiperidine (TEMP) were purchased from Tianjin Fuyu Fine Chemical Co, LTD. Hydroxylamine hydrochloride, acetonitrile, and glacial acetic acid were purchased from Sinopharm Chemical Reagent Co.

### Text S2 Characterization

The TMC materials were scanned by scanning electron microscope (SEM, Tescan, Xplore) to observe the morphological features. The catalyst elements and chemical states were characterized by X-ray diffraction spectroscopy (XRD, Bruker D8 Bruker, Germany) and X-ray photoelectron spectroscopy (XPS, AXIS SUPRA Kratos, Britain), and elemental analyses were performed by ICP-OES.

To assess the environmental impact of TMC we detected leached ions in the reaction system using an inductively coupled plasma mass spectrometer (ICP-MS, Thermo Fisher iCAP-RQ). A total organic carbon analyzer (TOC, Tekmar Fusion) was used to determine the residual content of organic carbon after the OFX degradation reaction. Acute toxicity analysis was performed by a rapid water toxicity analyzer (BX-LID-P, Hunan Biotechnology).

Electrochemical measurements of different catalysts were carried out on an electrochemical workstation (Shanghai Zhenhua CHI-660E) using Tafel scan, current-

time curve (I-t) linear scanning voltammetry (LSV) and impedance spectroscopy (EIS). A three-electrode system was used, i.e., a counter electrode (platinum wire), a working electrode and a reference electrode (saturated calomel electrode).

### Text S3 Detection of OFX concentration

Liquid chromatography-mass spectrometry (LC-MS, Agilent 1200, America) was conducted to analysis the concentration of residual TC and identify the intermediates of OFX degradation. A reverse phase Hypersil C-18 column (4.6 mm×250 mm, 5 μm) was equipped and the maximum absorption wavelength was 288 nm. The flow rate of mobile phase (0.01 mol/L oxalic acid: acetonitrile: methanol = 70:20:10, v:v:v) was 1 mL/min and the injection volume was 20 μL at 25 °C.

The flow rate of mobile phase (0.01 mol/L oxalic acid: acetonitrile: methanol = 70:20:10, v:v:v) was 1 mL/min and the injection volume was 20 μL at 25 °C. The concentrations of PMSO and PMSO<sub>2</sub> were monitored using high performance liquid chromatography (HPLC, UltiMate™3000, Japan) equipped with a C18 column (4.6 mm × 250 mm × 5 μm) and a UV detector at 215 nm. The mobile phase was 30:70 (v/v) acetonitrile and water at a flow rate of 1.0 mL/min.

**Table. S1 Liquid chromatography-mass spectrometry analysis data**

|     | m/z    | Molecular formula                                              | Chemical structure                                                                   |
|-----|--------|----------------------------------------------------------------|--------------------------------------------------------------------------------------|
| OFX | 361.14 | C <sub>18</sub> H <sub>20</sub> FN <sub>3</sub> O <sub>4</sub> | 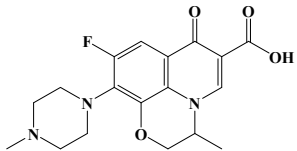 |
| P1  | 347.13 | C <sub>17</sub> H <sub>18</sub> FN <sub>3</sub> O <sub>4</sub> |  |
| P2  | 329.14 | C <sub>17</sub> H <sub>19</sub> N <sub>3</sub> O <sub>4</sub>  |  |

|     |        |                       |  |
|-----|--------|-----------------------|--|
| P3  | 301.14 | $C_{16}H_{19}N_3O_3$  |  |
| P4  | 321.11 | $C_{15}H_{16}FN_3O_4$ |  |
| P5  | 278.07 | $C_{13}H_{11}FN_2O_4$ |  |
| P6  | 335.13 | $C_{16}H_{18}FN_3O_4$ |  |
| P7  | 301.11 | $C_{15}H_{15}N_3O_4$  |  |
| P8  | 258.10 | $C_{14}H_{14}N_2O_3$  |  |
| P9  | 204.09 | $C_{11}H_{12}N_2O_2$  |  |
| P10 | 167.02 | $C_7H_5NO_4$          |  |

|     |        |              |                                                                                                                                                                                                                                                                                                                                                                                                                                                                                                                                                                                                                              |
|-----|--------|--------------|------------------------------------------------------------------------------------------------------------------------------------------------------------------------------------------------------------------------------------------------------------------------------------------------------------------------------------------------------------------------------------------------------------------------------------------------------------------------------------------------------------------------------------------------------------------------------------------------------------------------------|
| P11 | 149.05 | $C_8H_7NO_2$ | 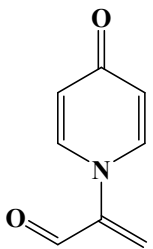<br>The image shows the chemical structure of 4-(2-methylacryloyl)pyridin-2(1H)-one. It consists of a pyridin-2(1H)-one ring system with a 2-methylacryloyl group attached to the nitrogen atom at the 4-position of the ring. The pyridinone ring is a six-membered ring with a nitrogen atom at the bottom and a carbonyl group (=O) at the top. The nitrogen atom is bonded to a 2-methylacryloyl group, which is a three-carbon chain with a double bond between the second and third carbons and a methyl group on the second carbon. |
|-----|--------|--------------|------------------------------------------------------------------------------------------------------------------------------------------------------------------------------------------------------------------------------------------------------------------------------------------------------------------------------------------------------------------------------------------------------------------------------------------------------------------------------------------------------------------------------------------------------------------------------------------------------------------------------|
